# Supplementary material for: Genome-wide survey of the bHLH super gene family in Brassica napus
Source: BMC Plant Biol. 2020 Mar 14;20:115. doi: 10.1186/s12870-020-2315-8 (PMC7071649; doi:10.1186/s12870-020-2315-8)
Supplement: Supplementary file 3 — Additional file 3: Table S3. Amino acid composition of the bHLH domain across different species. [file 12870_2020_2315_MOESM3_ESM.xlsx]

## Sheet: Table S3
Table S3. Amino acid composition of the bHLH domain across different species.
Species	Basic region								Helix 1 region		Helix 2 region
	site 9			site 10			site 12		site 25		site 51				site 57				site 61
	E	A	X	R	K	X	R	X	L	X	L	V	I	X	Y	H	E	X	L	X
Brassica.napus	0.694	0.081	0.225	0.739	0.143	0.118	0.859	0.141	0.995	0.005	0.706	0.095	0.07	0.129	0.729	0.085	0.051	0.135	0.929	0.071
Brassica.rapa	0.83	0.09	0.08	0.825	0.1	0.075	0.93	0.07	1	0	0.685	0.185	0.11	0.02	0.72	0.11	0.08	0.09	0.935	0.065
Arabidopsis	0.76	0.1	0.14	0.74	0.14	0.12	0.91	0.09	1	0	0.76	0.14	-	0.1	0.78	0.06	0.04	0.12	0.93	0.07
Solanum lycopersicum	0.75	0.11	0.14	0.76	0.18	0.06	0.94	0.06	0.99	0.01	0.78	-	0.11	0.11	0.74	0.13	-	0.13	0.97	0.03
Arachis duranensis	0.8	0.1	0.1	0.605	0.2	0.195	0.79	0.21	0.855	0.145	0.71	-	0.105	0.185	0.62	0.105	-	0.275	0.825	0.175
Oryza sativa	0.68	0.115	0.205	0.65	0.15	0.2	0.88	0.12	0.995	0.005	0.83	0.095	0.07	0.005	0.79	0.06	-	0.15	0.98	0.02
Zea mays	0.692	0.154	0.154	0.827	0.106	0.067	0.885	0.115	1	0	0.82	0.1	0.08	0	0.769	0.096	-	0.135	0.971	0.029
